# Supplementary material for: Thermosensitive PNIPAM semi-hollow spheres for controlled drug release
Source: Royal Society of Chemistry journal article supplement (doi:10.1039/c3tb20527d), 2013-01-01
Supplement: c3tb20527d.pdf [file c3tb20527d.pdf]

# Thermosensitive PNIPAM semi-hollow spheres for controlled drug release

*Jian Qian<sup>†,\*</sup> and Feipeng Wu<sup>\*</sup>*

Technical Institute of Physics and Chemistry, The Chinese Academy of Sciences, Beijing  
100190, P. R. China

Email: [jianqian@ku.edu](mailto:jianqian@ku.edu), [fpwu@mail.ipc.ac.cn](mailto:fpwu@mail.ipc.ac.cn)

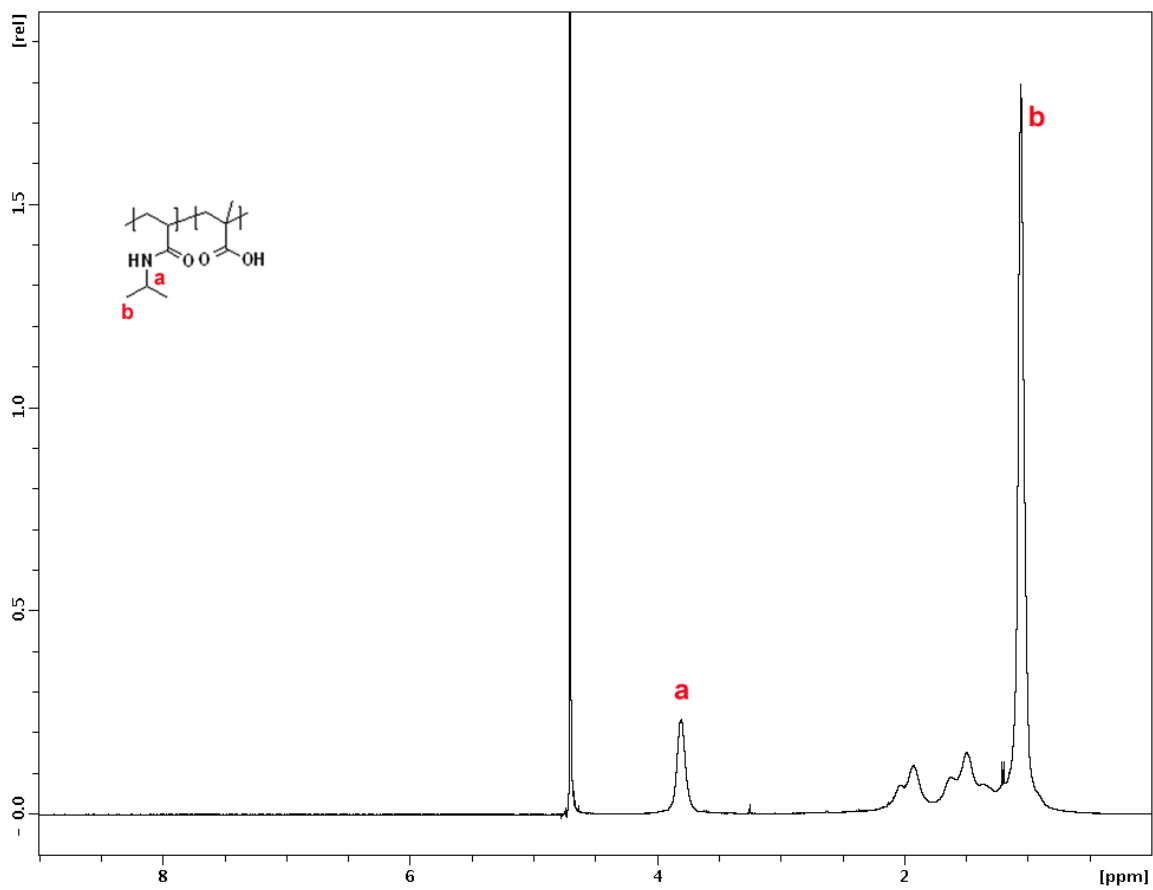

Figure S1.  $^1\text{H}$  NMR of PNIPAM-PMAA/ PNIPAM core/shell particles (1/2 ratio) in  $\text{D}_2\text{O}$ .

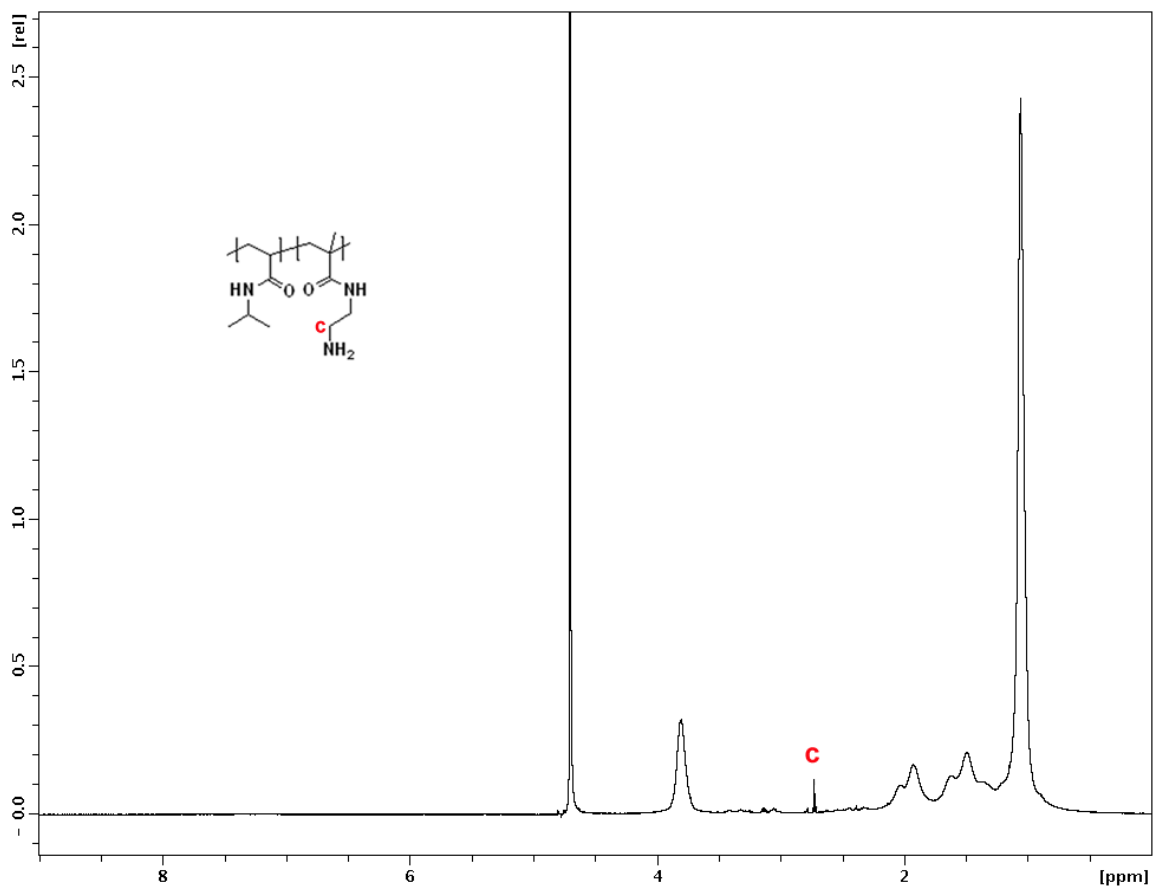

Figure S2.  $^1\text{H}$  NMR of PNIPAM-PMAA/ PNIPAM core/shell particles (1/2 ratio) modified with ethylenediamine in  $\text{D}_2\text{O}$ .

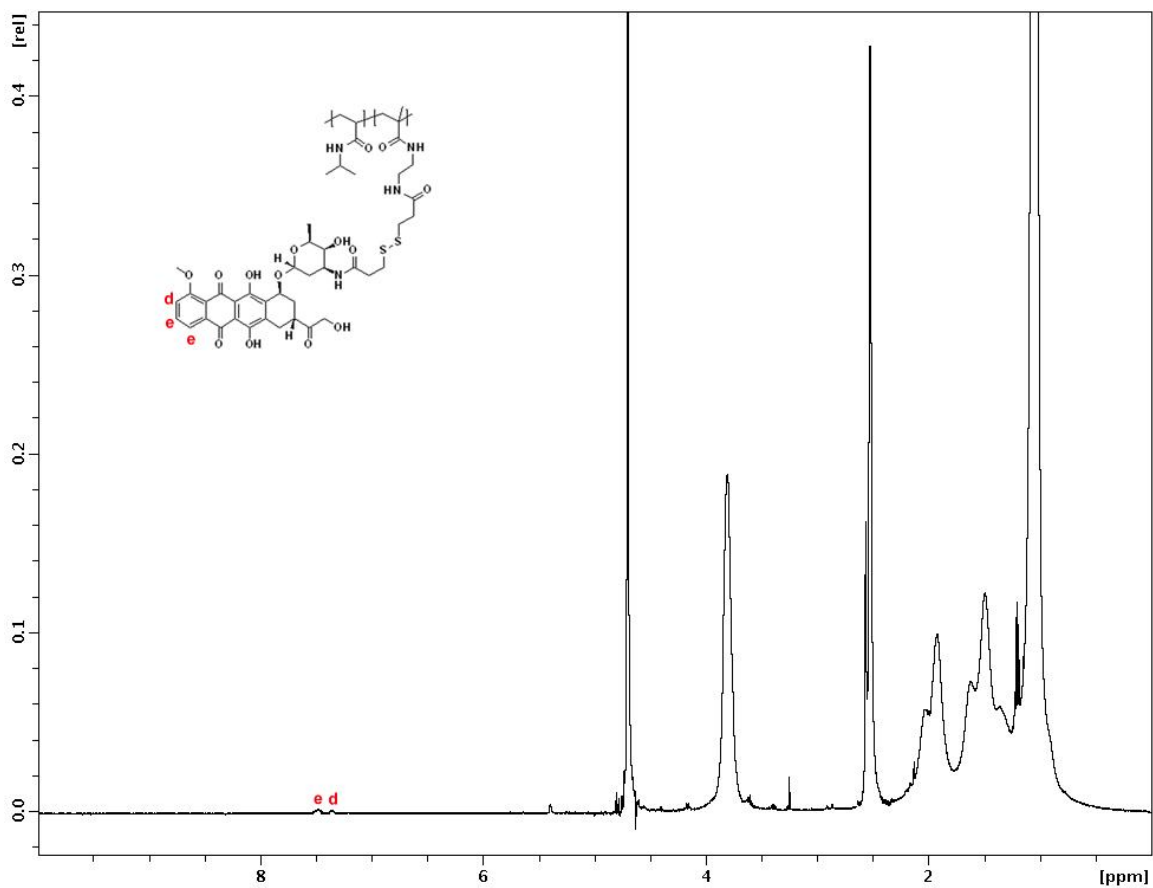

Figure S3.  $^1\text{H}$  NMR of PNIPAM-PMAA/ PNIPAM core/shell particles (1/2 ratio) conjugated with DOX in  $\text{D}_2\text{O}/\text{DMSO-d}_6$ . The peak d and e indicated the successful conjugation of DOX.

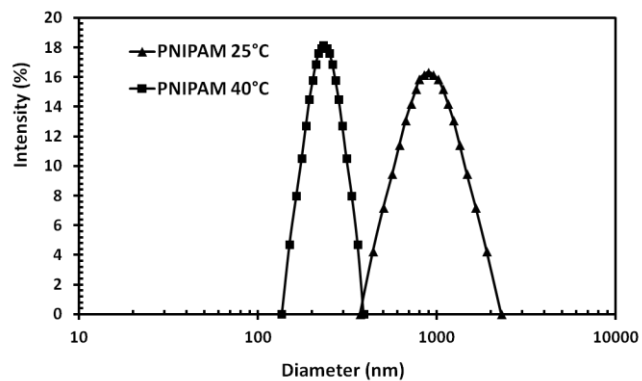

Figure S4. Size distribution histogram of self-cross-linked PNIPAM core at 25 and 40 °C.

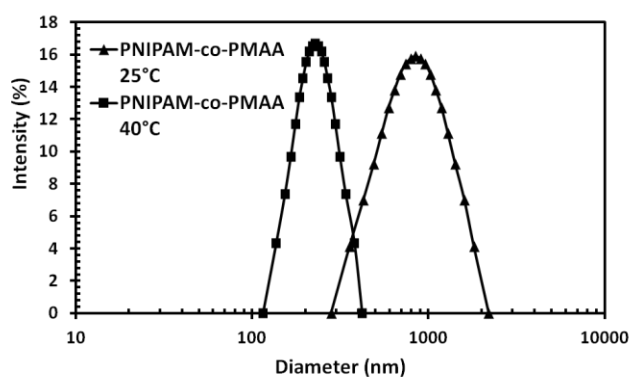

Figure S5. Size distribution histogram of self-cross-linked PNIPAM-co-PMAA core at 25 and 40 °C.

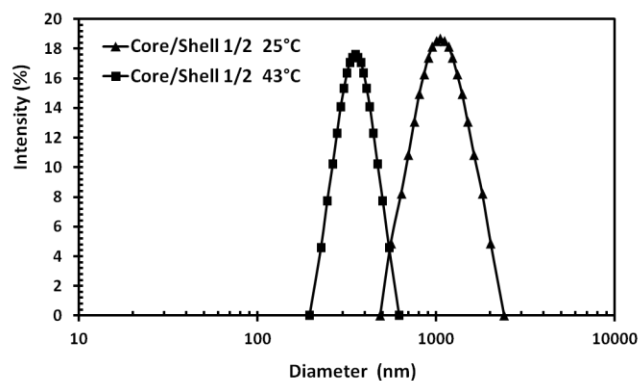

Figure S6. Size distribution histogram of core/shell 1/2 particles at 25 and 43 °C.

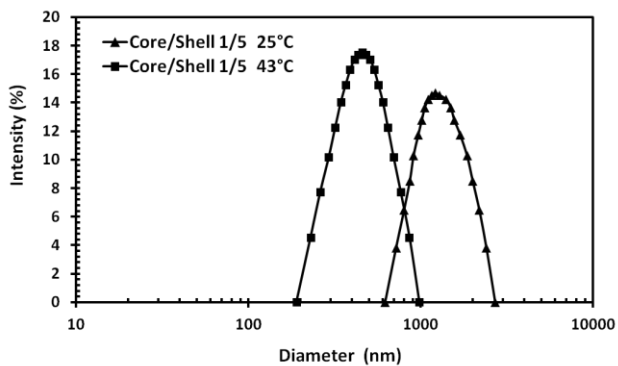

Figure S7. Size distribution histogram of core/shell 1/5 particles at 25 and 43 °C.

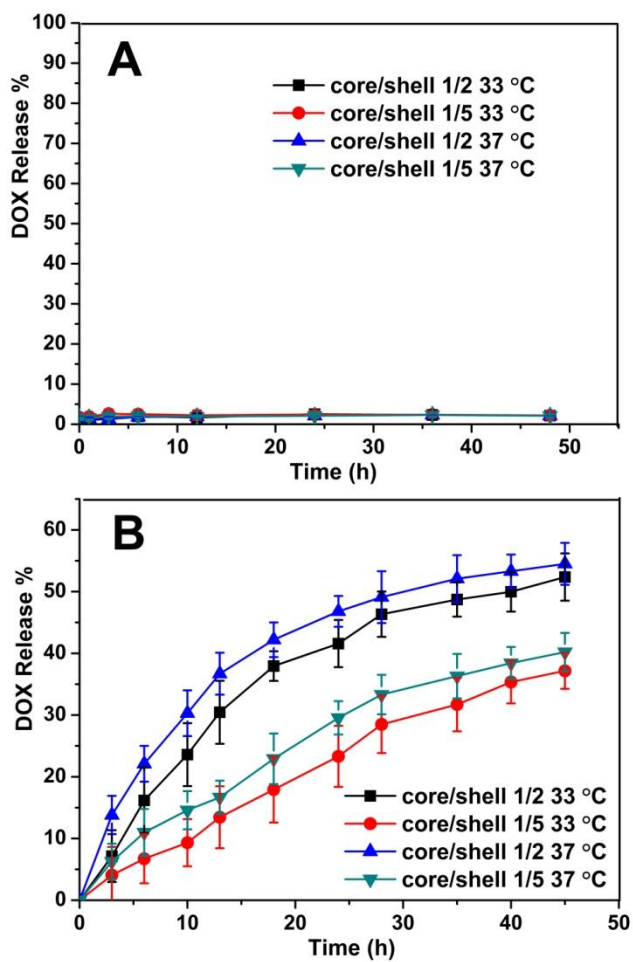

Figure S8. Releasing of DOX from semi-hollow spheres with (B) or without (A) GSH at 33 and 37 °C.
